# Supplementary figures and images for: Cigarette smoke and platelet-activating factor receptor dependent adhesion of Streptococcus pneumoniae to lower airway cells
Source: HighWire-hosted journal article supplement (doi:10.1136/thoraxjnl-2011-200835), 2012-05-01

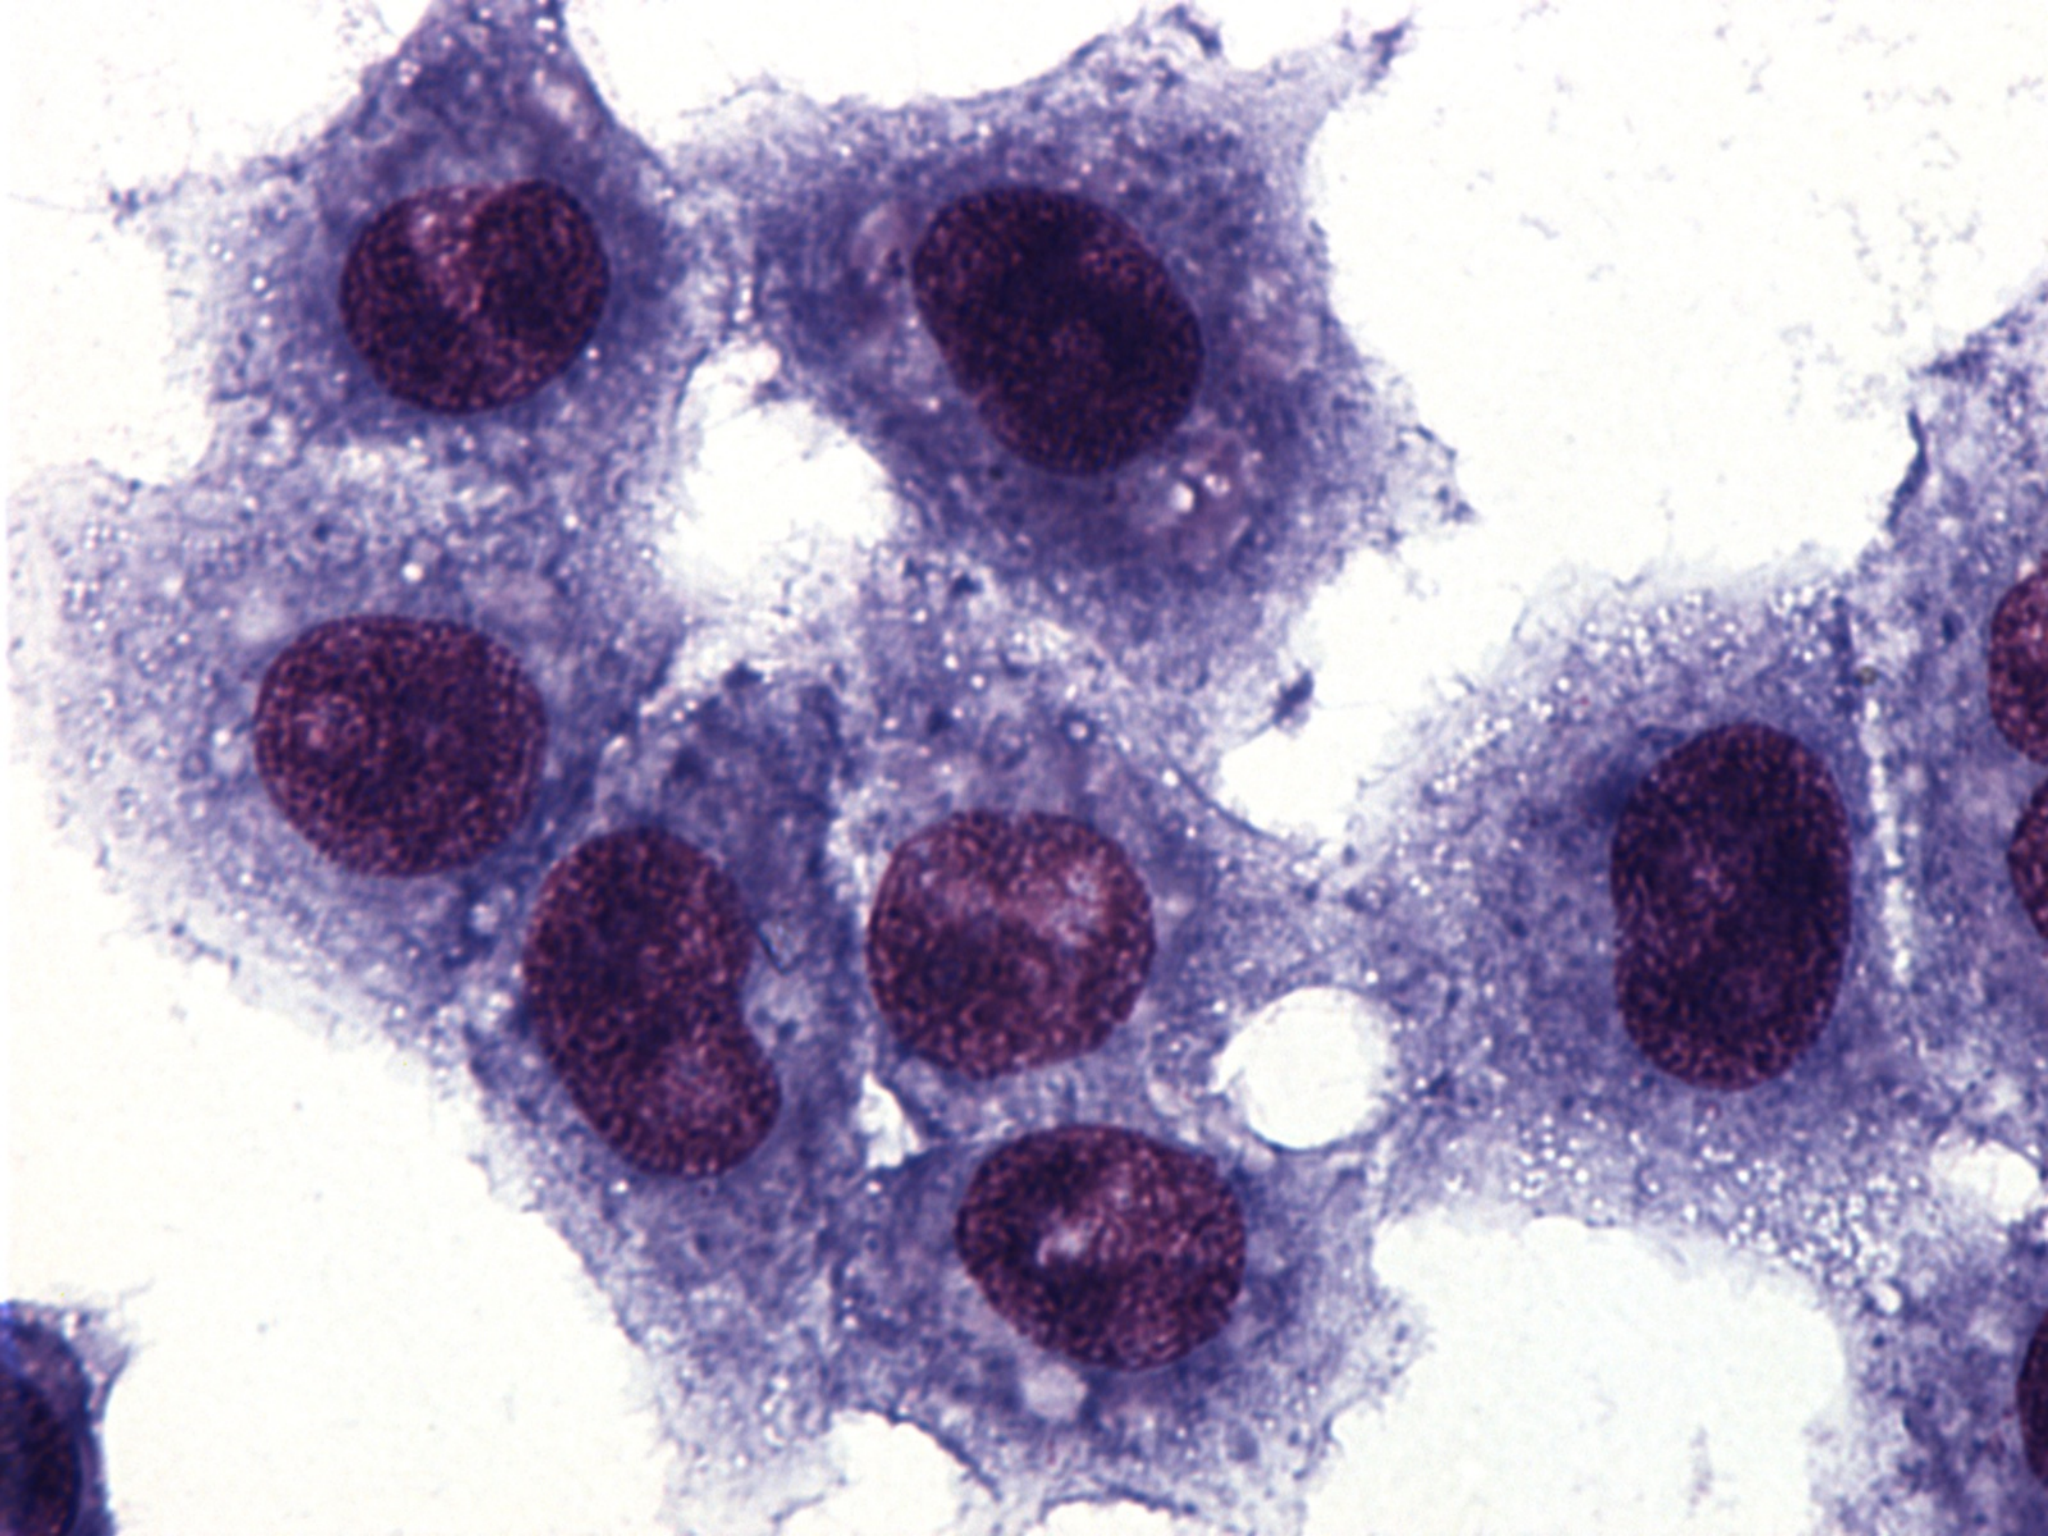

Supplement: thoraxjnl-2011-200835-s10.pdf [file thoraxjnl-2011-200835-s10.pdf]

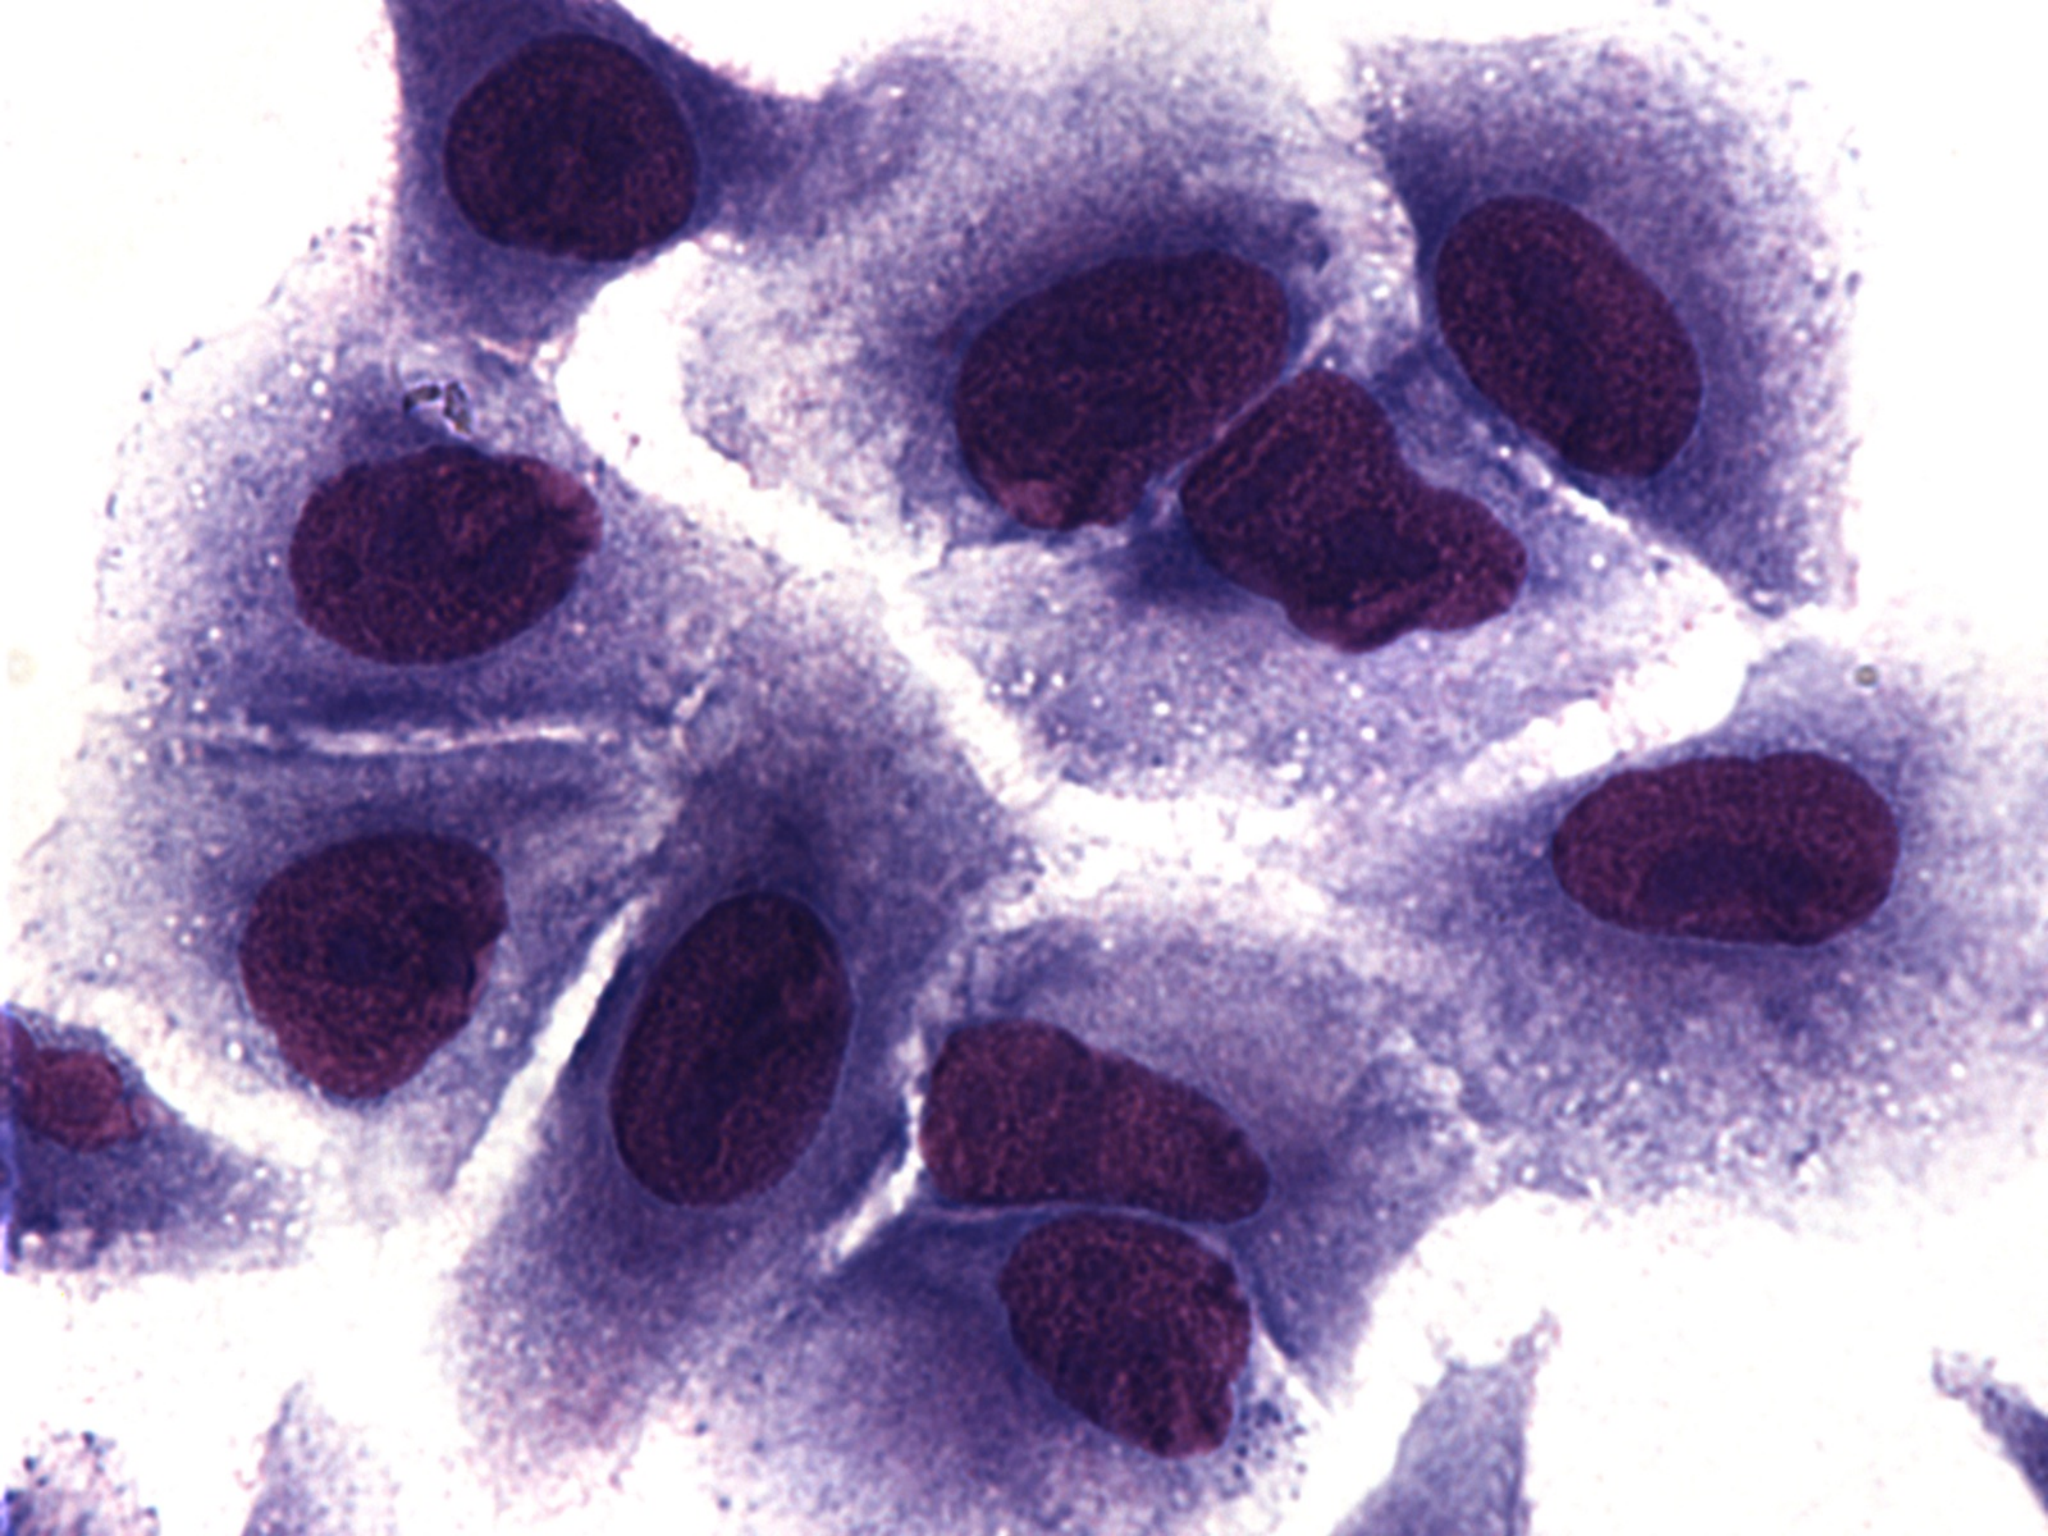

Supplement: thoraxjnl-2011-200835-s9.pdf [file thoraxjnl-2011-200835-s9.pdf]

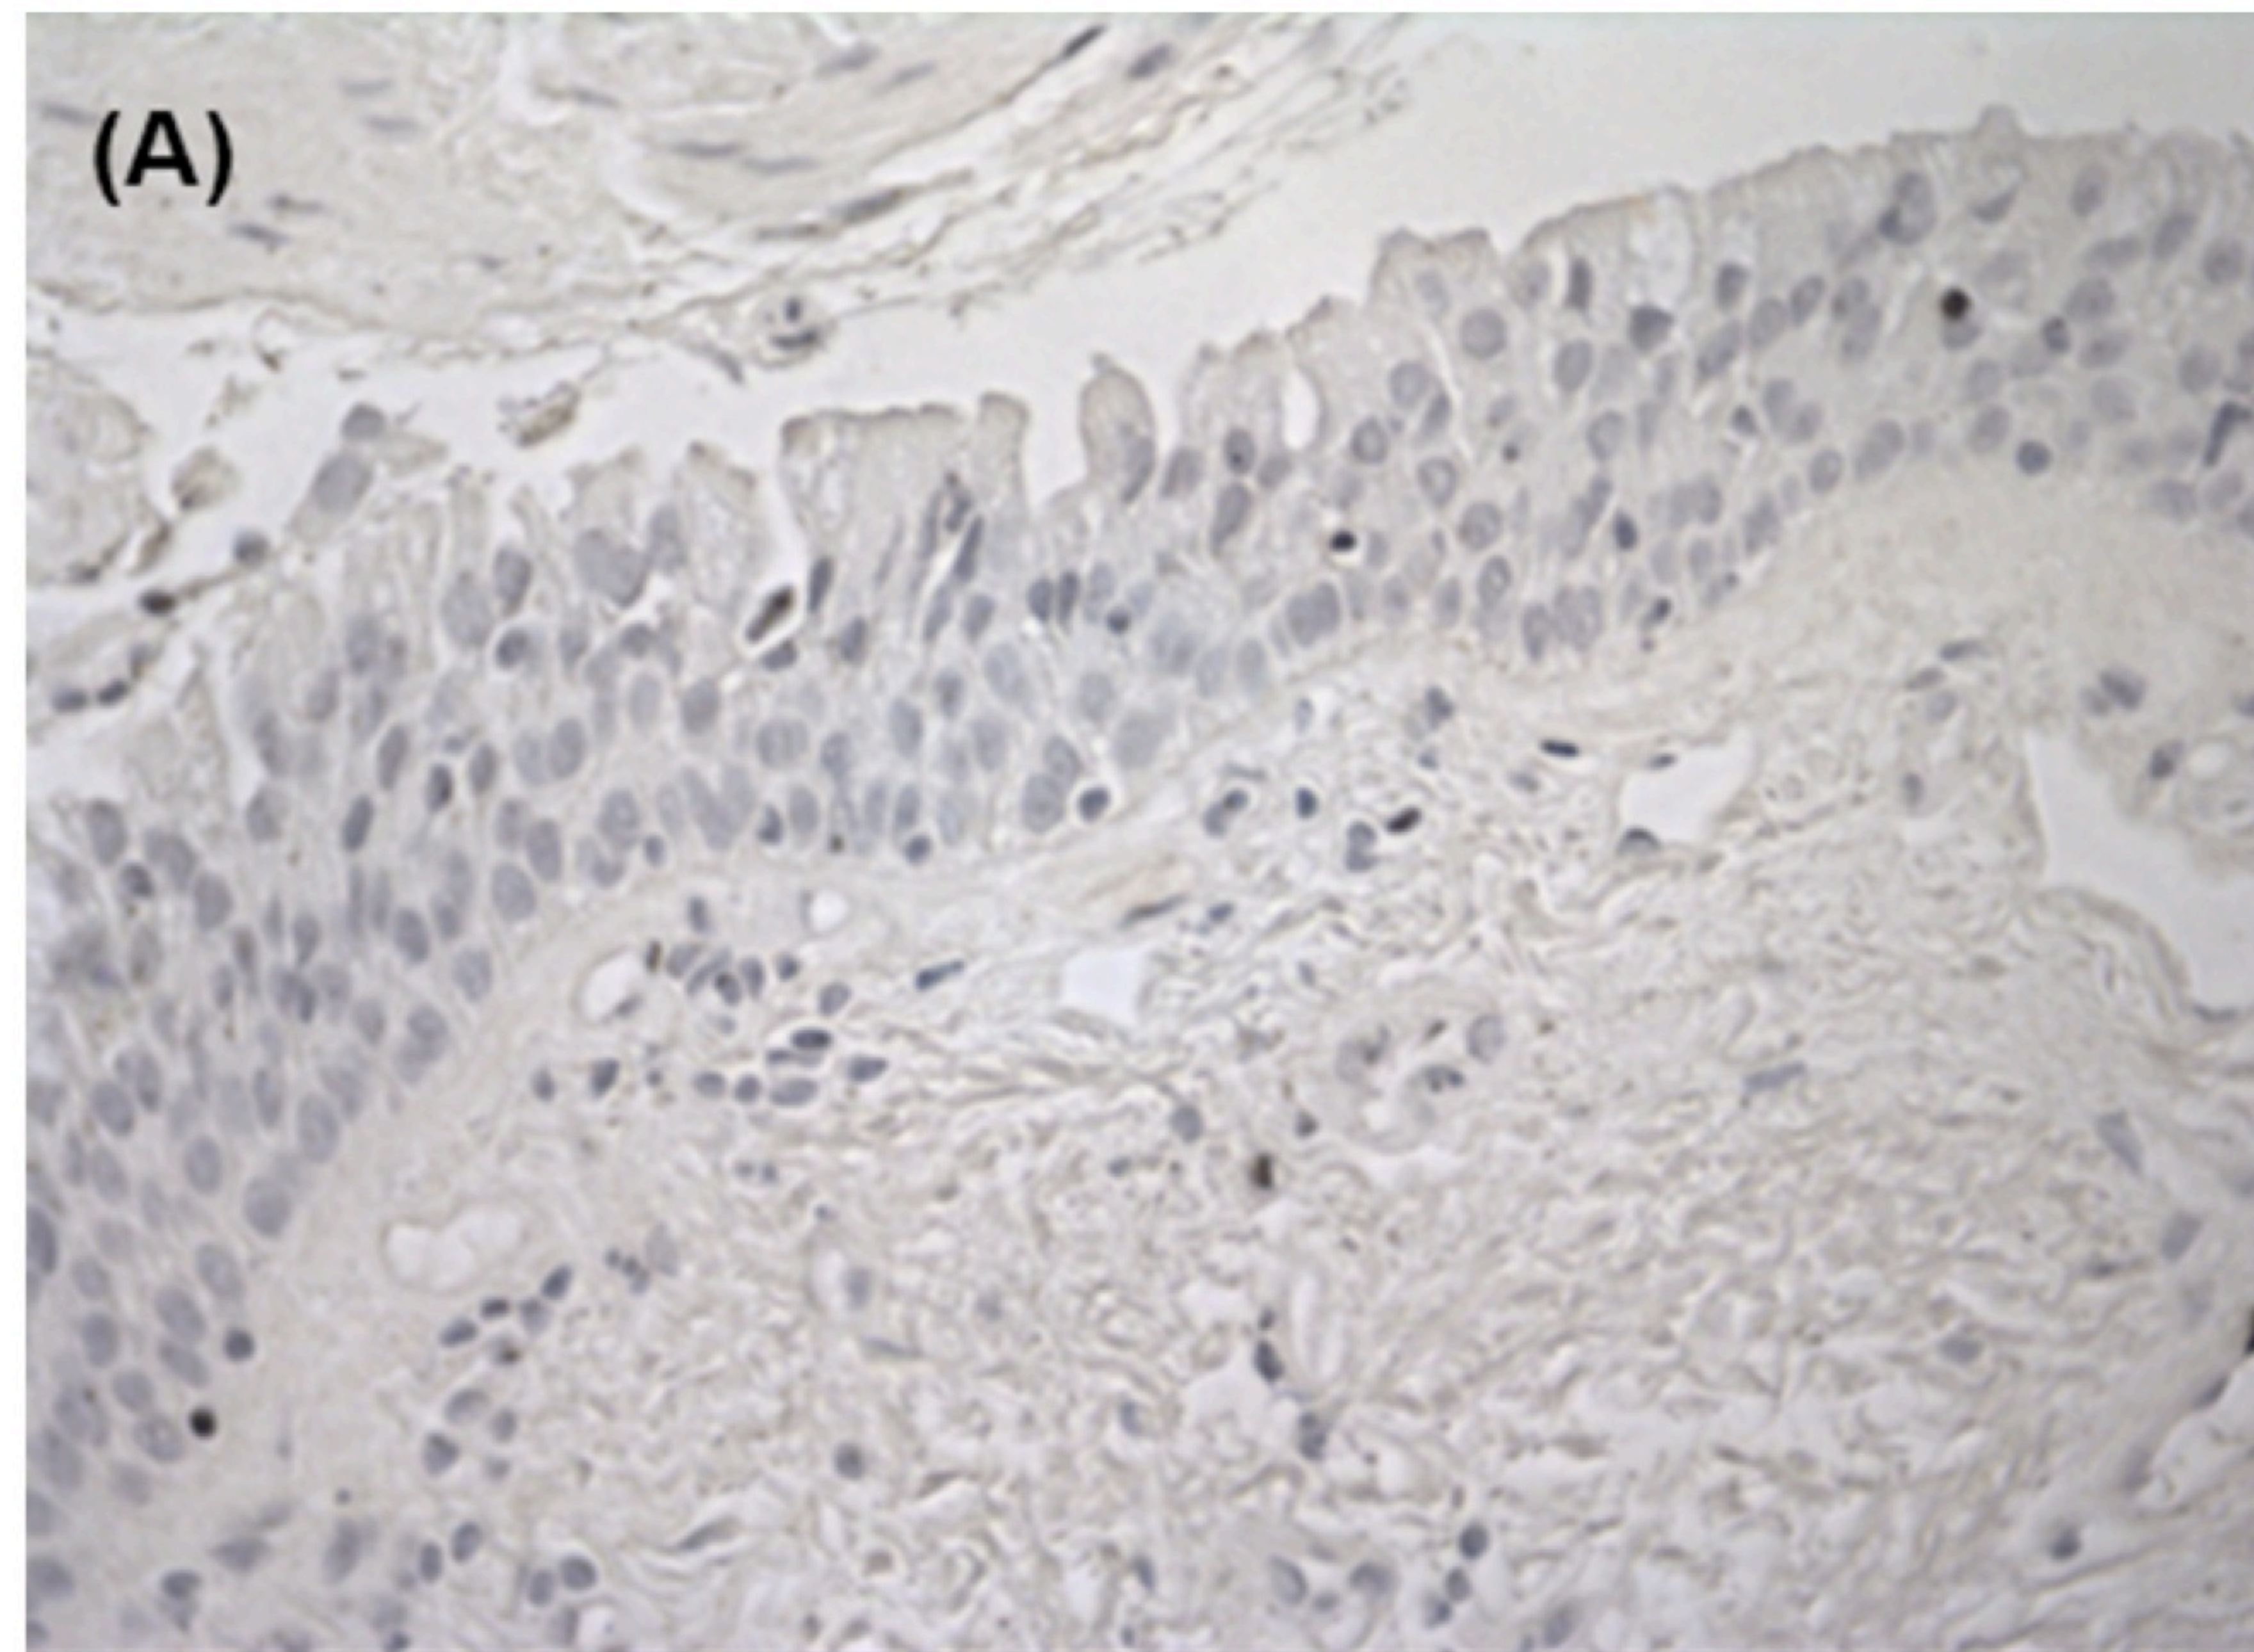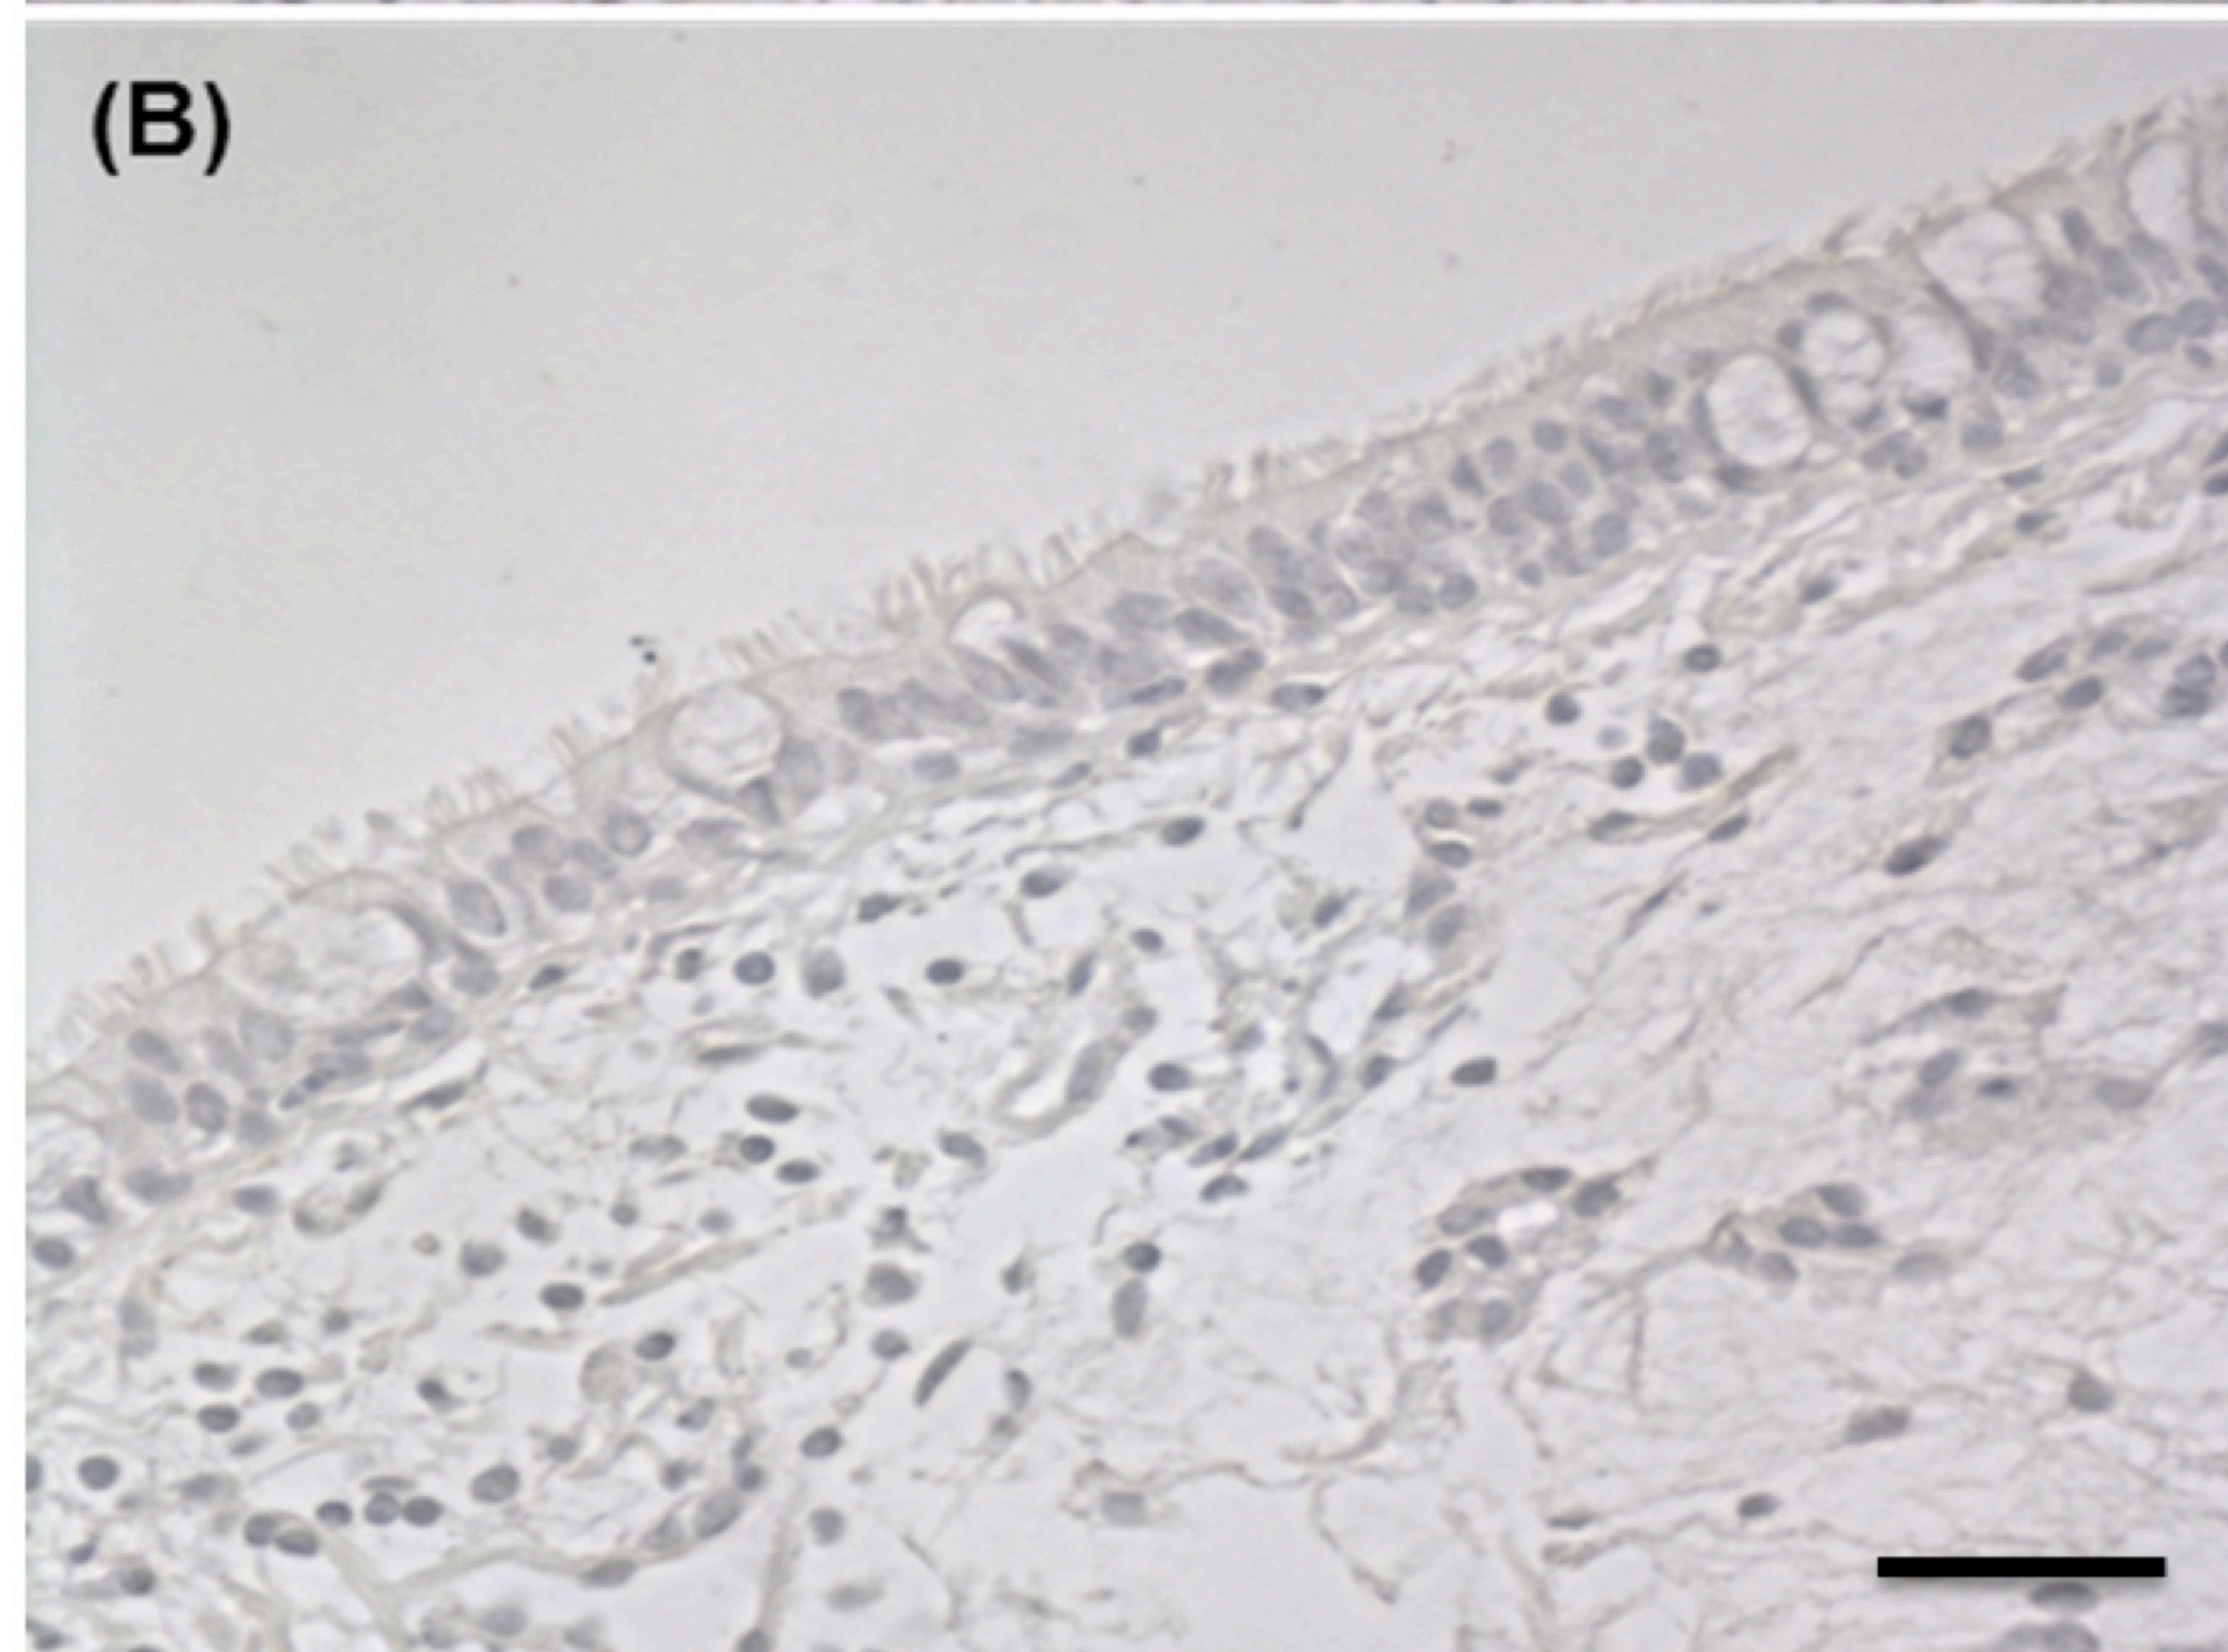

Supplement: thoraxjnl-2011-200835-s11.pdf [file thoraxjnl-2011-200835-s11.pdf]

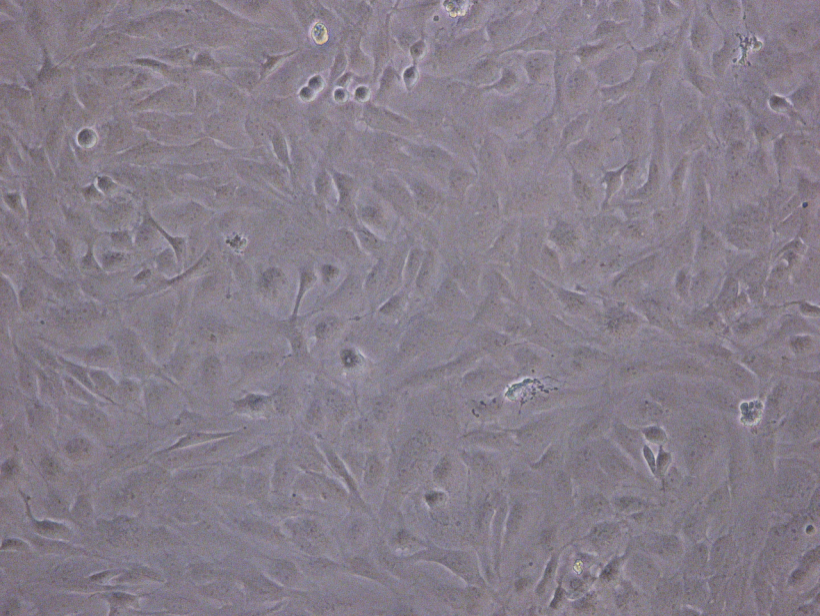

Supplement: thoraxjnl-2011-200835-s3.pdf [file thoraxjnl-2011-200835-s3.pdf]

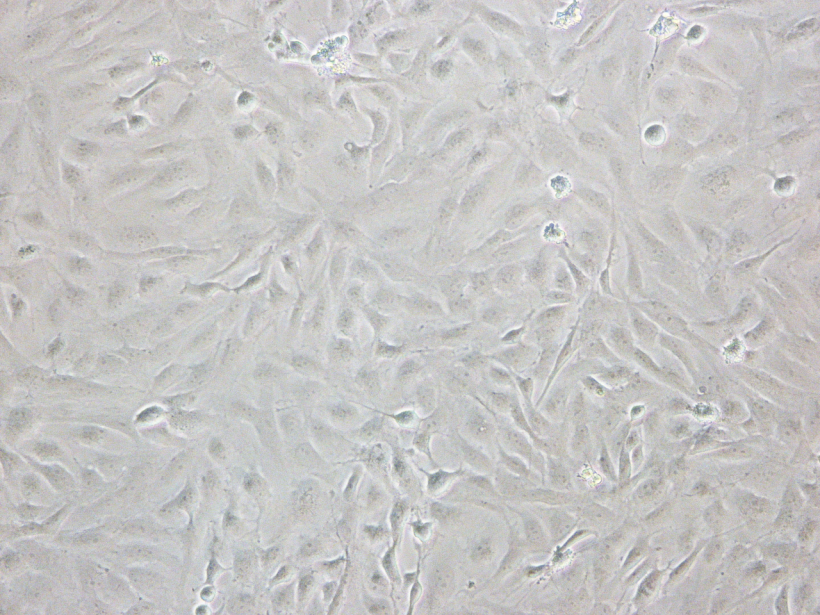

Supplement: thoraxjnl-2011-200835-s4.pdf [file thoraxjnl-2011-200835-s4.pdf]

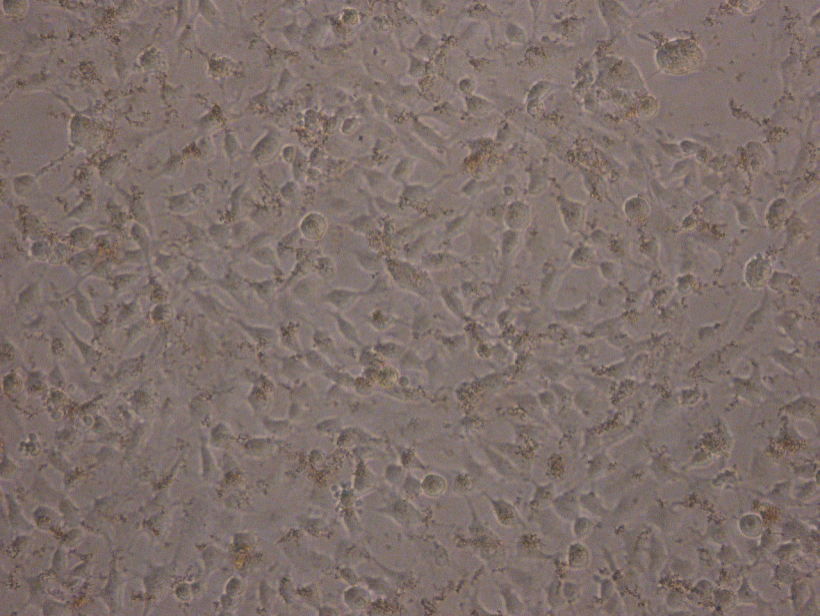

Supplement: thoraxjnl-2011-200835-s5.pdf [file thoraxjnl-2011-200835-s5.pdf]

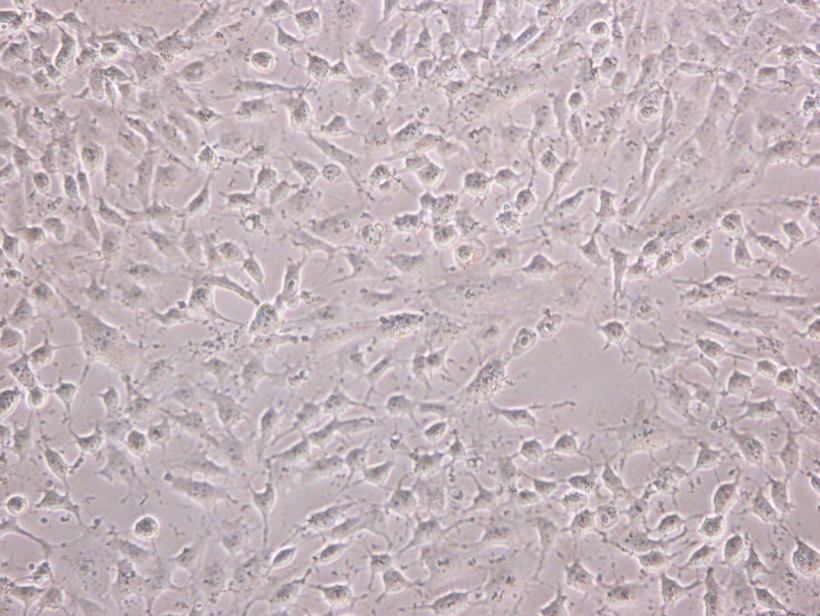

Supplement: thoraxjnl-2011-200835-s6.pdf [file thoraxjnl-2011-200835-s6.pdf]

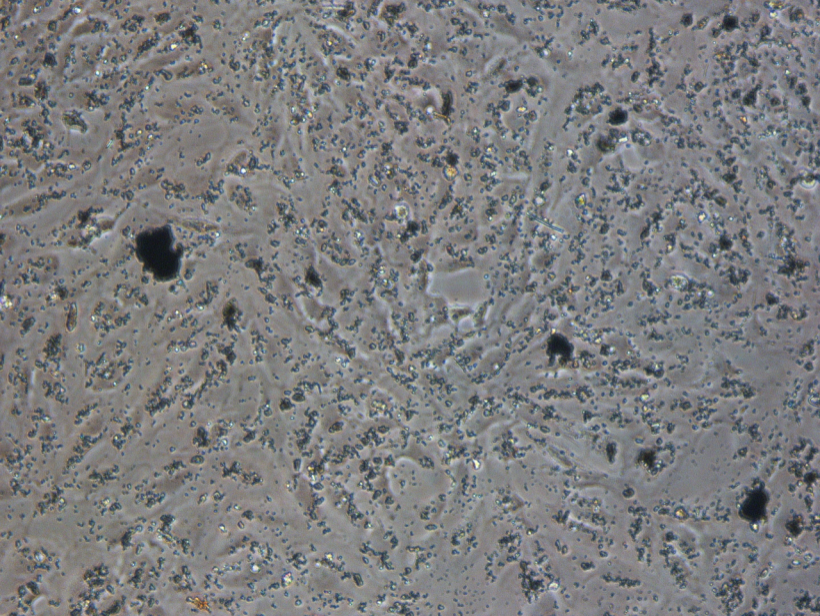

Supplement: thoraxjnl-2011-200835-s8.pdf [file thoraxjnl-2011-200835-s8.pdf]
